# Supplementary material for: Impacts of Marine Litter on Mediterranean Reef Systems: From Shallow to Deep Waters
Source: Frontiers journal article supplement (doi:10.3389/fmars.2020.581966), 2020-09-29
Supplement: Table_1.docx [file Table_1.docx]

Supplementary Material

Table S1. List of reef species impacted by marine litter in the Mediterranean Sea. Records are reported for different MSFD subregions. Litter categories, as well as the impact described in the cited papers, are cited. WMS = Western Mediterranean Sea; ISCM = Ionian Sea & Central Mediterranean Sea; AS = Adriatic Sea; ALS = Aegean-Levantine Sea.

| **Species** | **MSFD subregion** | **Litter typology** | **Impact** | **Citation** | |
| --- | --- | --- | --- | --- | --- |
| Annelida | | | | | |
| *Filograna implexa* | WMS | Fishing gear | Substratum | Cau et al., 2017 | |
| *Sabella pavonina* | WMS | Fishing gear | Substratum | Lastras et al., 2016 | |
| *Vermiliopsis spp.* | WMS | Fishing gear | Substratum | Lastras et al., 2016 | |
| Arthropoda | | | | | |
| *Geryon trispinosus* | WMS | Fishing gear | Ghost-fishing | Ramirez-Llodra et al., 2011 | |
| *Maja squinado* | WMS | Fishing gear | Ghost-fishing | Houard et al., 2012 | |
| *Munida* | WMS | Fishing gear | Behavioral | Pierdomenico et al., 2018 | |
| *Munida rugosa* | WMS | Fishing gear | Ghost-fishing | Angiolillo & Canese, 2017 | |
| *Pachylasma giganteum* | ISCM | Fishing gear | Entanglement | Consoli et al., 2020 | |
| *Palinurus elephas* | WMS | Fishing gear | Ghost-fishing | Cau et al., 2017; Gili et al., 2014 | |
| *Paromola cuvieri* | ISCM | Artificial polymer materials | Behavioral | Pierdomenico et al., 2019 | |
| WMS | Artificial polymer materials | Behavioral | Angiolillo, 2019; Mecho et al., 2018; Taviani et al., 2017 | |
|  | WMS | Metal | Behavioral | Angiolillo & Pisapia, 2015; Mecho et al., 2018; Taviani et al., 2017 | |
| *Plesionika spp.* | ISCM | Undefined | Behavioral | Pierdomenico et al., 2019 | |
| Chordata | | | | | |
| *Anthias anthias* | WMS | Undefined | Behavioral | Angiolillo et al., 2015 | |
| *Callanthias ruber* | WMS | Undefined | Behavioral | Angiolillo et al., 2015 | |
| *Coelorinchus caelorhincus* | WMS | Artificial polymer materials | Behavioral | Pierdomenico et al., 2019 | |
| *Conger conger* | WMS | Fishing gear | Ghost-fishing | Houard et al., 2012 | |
| *Epinephelus aeneus* | ALS | Fishing gear | Ghost-fishing | Ayaz et al., 2010 | |
| *Helicolenus dactylopterus* | ISCM | Artificial polymer materials | Behavioral | Pierdomenico et al., 2019 | |
| WMS | Undefined | Behavioral | Angiolillo & Pisapia, 2015 | |
| *Mobula mobular* | WMS | Fishing gear | Ghost-fishing | Houard et al., 2012 | |
| *Mola mola* | WMS | Fishing gear | Ghost-fishing | Enrichetti et al., 2020 | |
| *Muraena helena* | WMS | Undefined | Behavioral | Angiolillo et al., 2015 | |
| *Scorpaena elongata* | WMS | Undefined | Behavioral | Angiolillo et al., 2015 | |
| *Scorpaena notata* | WMS | Fishing gear | Ghost-fishing | Houard et al., 2012 | |
| *Scorpaena porcus* | WMS | Fishing gear | Ghost-fishing | Houard et al., 2012 | |
| *Scorpaena scrofa* | ALS | Fishing gear | Ghost-fishing | Ayaz et al., 2010 | |
| WMS | Fishing gear | Ghost-fishing | Houard et al., 2012 | |
| Undefined | Behavioral | Angiolillo et al., 2015 | |
| *Scyliorhinus spp.* | AS | Fishing gear | Ghost-fishing | Butterworth et al., 2012 | |
| *Serranus scriba* | WMS | Fishing gear | Ghost-fishing | This paper | |
| *Symphodus roissali* | AS | Fishing gear | Ghost-fishing | Moschino et al., 2019 | |
| *Trachurus mediterraneus* | WMS | Fishing gear; Undefined | Behavioral | Angiolillo & Pisapia, 2015 | |
| Cnidaria | | | | | |
| *Acanthogorgia hirsuta* | ISCM | Glass/ceramics | Substratum | Pierdomenico et al., 2019 | |
| Undefined | Entanglement/coverage | Consoli et al., 2018 | |
| WMS | Fishing gear | Entanglement | Consoli et al., 2019 | |
| Undefined | Entanglement | Cau et al., 2017 | |
| Alcyonacea | WMS | Fishing gear | Entanglement/coverage | Bo et al., 2011 | |
| *Alcyonium acaule* | WMS | Fishing gear | Substratum | Angiolillo et al., 2015 | |
| *Alcyonium coralloides* | WMS | Fishing gear | Substratum | Angiolillo et al., 2015 | |
| *Alcyonium palmatum* | WMS | Fishing gear | Substratum | Angiolillo et al., 2015 | |
| *Antipathella subpinnata* | AS | Fishing gear | Entanglement; Incorporation; Substratum | Chimienti et al., 2020 | |
| ISCM | Fishing gear | Substratum | Consoli et al., 2020 | |
| Undefined | Entanglement/coverage | Consoli et al., 2018 | |
| WMS | Fishing gear | Entanglement | Angiolillo et al., 2015 | |
| Consoli et al., 2019 | |
| Giusti et al., 2019 | |
| Not defined | Giusti et al., 2019 | |
| Undefined | Entanglement | Bo et al., 2014b; Cau et al., 2017 | |
| *Antipathes dichotoma* | ISCM | Undefined | Entanglement/coverage | Consoli et al., 2018 | |
| WMS | Fishing gear | Entanglement | Angiolillo et al., 2015; Bo et al., 2014b; Giusti et al., 2019 | |
| Undefined | Entanglement | Cau et al., 2017 | |
| *Astroides calycularis* | WMS | Fishing gear | Entanglement | Terrón-Sigler, 2015a | |
| *Bebryce mollis* | ISCM | Undefined | Not defined | Consoli et al., 2020 | |
| Undefined | Entanglement/coverage | Consoli et al., 2018 | |
| WMS | Fishing gear | Entanglement | Angiolillo et al., 2015; Bo et al., 2012 | |
| *Callogorgia verticillata* | ISCM | Fishing gear | Entanglement/coverage | Consoli et al., 2018 | |
| WMS | Fishing gear | Entanglement | Angiolillo et al., 2015; Bo et al., 2014c; Bo et al., 2015; Fabri et al., 2014 | |
| Undefined | Entanglement | Bo et al., 2012; Bo et al., 2014b; Cau et al., 2017 | |
| Ceriantharia | WMS | Fishing gear | Entanglement | Angiolillo et al., 2015 | |
| *Chironephthya mediterranea* | WMS | Fishing gear | Entanglement | Angiolillo et al., 2015 | |
| *Corallium rubrum* | ISCM | Fishing gear | Coverage | Cattaneo-Vietti et al., 2017 | |
| Entanglement | Cattaneo-Vietti et al., 2017 | |
| Entanglement/coverage | Consoli et al., 2018 | |
| WMS | Fishing gear | Coverage | Angiolillo et al., 2015 | |
| Entanglement | Angiolillo & Canese, 2017; Angiolillo et al., 2015; Bavestrello et al., 2014; Consoli et al., 2019; Enrichetti et al., 2019; Giusti et al., 2019 | |
| Undefined | Entanglement | Cau et al., 2017 | |
| *Dendrophyllia cornigera* | WMS | Fishing gear | Entanglement | Angiolillo et al., 2015; Bo et al., 2014b; Giusti et al., 2019 | |
| Incorporation | Angiolillo & Canese, 2017 | |
| Not defined | Giusti et al., 2019 | |
| Undefined | Entanglement | Cau et al., 2017 | |
| *Dendrophyllia ramea* | ALS | Fishing gear | Entanglement | Orejas et al., 2019 | |
| WMS | Fishing gear | Entanglement | Consoli et al., 2019; Terrón-Sigler, 2015b | |
| *Desmophyllum dianthus* | WMS | Fishing gear | Substratum | Taviani et al., 2019 | |
| *Desmophyllum pertusum* | ISCM | Undefined | Entanglement | D’Onghia et al., 2017 | |
| WMS | Fishing gear | Incorporation | Aymà et al., 2019 | |
| Substratum | Fabri et al., 2014 | |
| Artificial polymer materials | Entanglement | Fabri et al., 2014 | |
| *Ellisella paraplexauroides* | WMS | Fishing gear | Entanglement | Maldonado et al., 2013 | |
| *Eunicella cavolini* | AS | Fishing gear | Entanglement | Sini et al., 2015 | |
| ALS | Fishing gear | Entanglement | Salomidi et al., 2009; Sini et al., 2015 | |
| ISCM | Fishing gear | Entanglement/coverage | Consoli et al., 2018 | |
| WMS | Fishing gear | Coverage | Angiolillo et al., 2015; Angiolillo, 2019 | |
| Entanglement | Angiolillo et al., 2015; Angiolillo, 2019; Betti et al., 2020a; Bo et al., 2012; Bo et al., 2014a; Bo et al., 2014b; Cánovas-Molina et al., 2016; Giusti et al., 2019; Sbrescia et al., 2005 | |
| Entanglement/coverage | Consoli et al., 2019 | |
| Substratum | Angiolillo et al., 2015 | |
| Undefined | Substratum | Angiolillo et al., 2015 | |
| Undefined | Entanglement | Cau et al., 2017 | |
| *Eunicella singularis* | ISCM | Undefined | Entanglement/coverage | Consoli et al., 2018 | |
| WMS | Fishing gear | Entanglement | Consoli et al., 2019; Sbrescia et al., 2005 | |
| *Eunicella verrucosa* | ISCM | Undefined | Entanglement/coverage | Consoli et al., 2018 | |
| WMS | Fishing gear | Entanglement | Angiolillo et al., 2015; Chimienti et al., 2020; Consoli et al., 2019; Enrichetti et al., 2020; Giusti et al., 2019 | |
| Not defined | Giusti et al., 2019 | |
| *Leiopathes glaberrima* | ISCM | Fishing gear | Entanglement | Consoli et al., 2020; Deidun et al., 2015 | |
| Artificial polymer materials | Entanglement | Deidun et al., 2015 | |
| Undefined | Entanglement/coverage | Consoli et al., 2018 | |
| WMS | Fishing gear | Entanglement | Angiolillo et al., 2015; Bo et al., 2014b; Bo et al., 2014c; Bo et al., 2015 | |
| Not defined | Giusti et al., 2019 | |
| Undefined | Entanglement | Cau et al., 2017 | |
| *Leptogorgia sarmentosa* | WMS | Fishing gear | Not defined | Giusti et al., 2019 | |
| *Madrepora oculata* | AS | Fishing gear | Substratum | Angeletti et al., 2013 | |
| ISCM | Fishing gear | Coverage | Savini et al., 2014 | |
| Entanglement | Savini et al., 2014 | |
| Artificial polymer materials | Coverage | Freiwald et al., 2009; Prampolini et al., 2019; Savini et al., 2014 | |
| Incorporation | Savini et al., 2014 | |
| Undefined | Entanglement | D’Onghia et al., 2017 | |
| WMS | Fishing gear | Entanglement | Fabri et al., 2014; Fanelli et al., 2017; Lastras et al., 2016; Madurell et al., 2012; Moccia et al., 2019; Orejas et al., 2009 | |
| Substratum | Lastras et al., 2016; Taviani et al., 2019 | |
| Chemicals | Coverage | Fabri et al., 2019 | |
| Artificial polymer materials | Coverage | Taviani et al., 2017 | |
| Entanglement | Moccia et al., 2019; Taviani et al., 2017 | |
| Metal | Substratum | Fanelli et al., 2017 | |
| Undefined | Entanglement | Cau et al., 2017 | |
| *Paramuricea clavata* | AS | Fishing gear | Entanglement | Chimienti et al., 2020; Kipson et al., 2015 | |
| ISCM | Fishing gear | Entanglement/coverage | Consoli et al., 2018 | |
| WMS | Fishing gear | Coverage | Angiolillo et al., 2015; Enrichetti et al., 2019; Enrichetti et al., 2020 | |
| Entanglement | Angiolillo et al., 2015; Bavestrello et al., 1997; Betti et al., 2020b; Bo et al., 2012; Bo et al., 2014b; Consoli et al., 2019; Giusti et al., 2019; Harmelin & Marinopoulos, 1994; Houard et al., 2012 | |
| Not defined | Giusti et al., 2019 | |
| Substratum | Angiolillo et al., 2015 | |
| Metal | Entanglement | Enrichetti et al., 2019 | |
| Undefined | Substratum | Angiolillo et al., 2015 | |
| Entanglement | Cau et al., 2017 | |
| *Paramuricea macrospina* | ISCM | Undefined | Entanglement/coverage | Consoli et al., 2018 | |
| WMS | Fishing gear | Entanglement | Angiolillo et al., 2015 | |
| Substratum | Angiolillo et al., 2015 | |
| *Parantipathes spp.* | WMS | Undefined | Entanglement | Bo et al., 2020 | |
| *Parantipathes larix* | ISCM | Undefined | Entanglement/coverage | Consoli et al., 2018 | |
| WMS | Fishing gear | Entanglement | Bo et al., 2014a | |
| Undefined | Entanglement | Cau et al., 2017 | |
| *Savalia savaglia* | ISCM | Fishing gear | Entanglement/coverage | Consoli et al., 2018 | |
| WMS | Fishing gear | Entanglement | Angiolillo et al., 2015 | |
| *Swiftia dubia* | ISCM | Artificial polymer materials | Entanglement | | Pierdomenico et al., 2019 |
| *Viminella flagellum* | ISCM | Fishing gear | Entanglement/coverage | | Consoli et al., 2018 |
| Undefined | Not defined | | Consoli et al., 2020 |
| WMS | Fishing gear | Entanglement | | Angiolillo et al., 2014; Angiolillo et al., 2015 |
| Undefined | Entanglement | | Cau et al., 2017 |
| Echinodermata | | | | | |
| *Astrospartus mediterraneus* | WMS | Fishing gear | Substratum | | Angiolillo et al., 2015 |
| Cidaridae | WMS | Fishing gear | Substratum | | Angiolillo et al., 2015; Angiolillo, 2019 |
| *Cidaris cidaris* | ISCM | Artificial polymer materials | Entanglement | | Pierdomenico et al., 2019 |
| *Gracilechinus acutus* | WMS | Artificial polymer materials | Substratum | | Lastras et al., 2016 |
| *Ophiothrix spp.* | WMS | Fishing gear | Substratum | | Lastras et al., 2016 |
| Mollusca | | | | | |
| *Neopycnodonte cochlear* | WMS | Fishing gear | Substratum | | Fabri et al., 2014; Lastras et al., 2016 |
| *Sepia officinalis* | ALS | Fishing gear | Ghost-fishing | | Ayaz et al., 2010 |
| Porifera | | | | | |
| *Aplysina cavernicola* | WMS | Fishing gear | Entanglement | Angiolillo et al., 2015 | |
| *Geodia cydonium* | AS | Fishing gear | Coverage | Melli et al., 2017 | |
| *Haliclona (Reniera) spp.* | WMS | Fishing gear | Substratum | Lastras et al., 2016 | |
| *Leiodermatium pfeifferae* | WMS | Fishing gear | Entanglement | Maldonado et al., 2015 | |
| *Pachastrella monilifera* | WMS | Fishing gear | Entanglement | Angiolillo, 2019 | |
| *Poecillastra compressa* | WMS | Fishing gear | Entanglement | Angiolillo et al., 2015; Angiolillo, 2019 | |
| *Raspailia (Raspailia) viminalis* | ISCM | Undefined | Entanglement | Consoli et al., 2018 | |

**References**

Angeletti, L., Taviani, M., Canese, S., Foglini, F., Mastrototaro, F., Argnani, A., et al. (2013). New deep-water cnidarian sites in the southern Adriatic Sea. Mediterr. Mar. Sci. 15, 263. doi:10.12681/mms.558.

Angiolillo, M., Bavestrello, G., Bo, M., Cau, A., Cau, A., Giusti, M., et al. (2014). Distribution of the deep-dwelling gorgonia *Viminella flagellum* in the Italian Western Mediterranean Sea by means of multi-year ROV surveys. In 1st Mediterranean Symposium on the conservation of Dark Habitats (Portorož), 2013–2014.

Angiolillo, M., Lorenzo, B. di, Farcomeni, A., Bo, M., Bavestrello, G., Santangelo, G., et al. (2015). Distribution and assessment of marine debris in the deep Tyrrhenian Sea (NW Mediterranean Sea, Italy). Mar. Pollut. Bull. 92, 149–159. doi:10.1016/j.marpolbul.2014.12.044.

Angiolillo, M., and Pisapia, M. (2015). Colori profondi del Mediterraneo. Roma: ISPRA.

Angiolillo, M., and Canese, S. (2018). “Deep Gorgonians and Corals of the Mediterranean Sea,” in Corals in a Changing World, eds. C. Duque and E. T. Camacho (InTech). doi:10.5772/intechopen.69686.

Angiolillo, M. (2019). “Debris in Deep Water,” in World Seas: an Environmental Evaluation, ed. C. Sheppard (Elsevier), 251–268. doi:10.1016/B978-0-12-805052-1.00015-2.

Ayaz, A., Ünal, V., Acarli, D., and Altinagac, U. (2010). Fishing gear losses in the Gökova Special Environmental Protection Area (SEPA), eastern Mediterranean, Turkey. J. Appl. Ichthyol. 26, 416–419. doi:10.1111/j.1439-0426.2009.01386.x.

Aymà, A., Aguzzi, J., Canals, M., Company, J. B., Lastras, G., Mecho, A., et al. (2019). “Occurrence of Living Cold-Water Corals at Large Depths Within Submarine Canyons of the Northwestern Mediterranean Sea,” in Mediterranean Cold-Water Corals: Past, Present and Future, ed. C. J. C. Orejas (Springer International Publishing AG), 271–284. doi:10.1007/978-3-319-91608-8_26.

Bavestrello, G., Cerrano, C., Zanzi, D., and Cattaneo-Vietti, R. (1997). Damage by fishing activities to the Gorgonian coral Paramuricea clavata in the Ligurian Sea. Aquat. Conserv. Mar. Freshw. Ecosyst. 7, 253–262. doi:10.1002/(SICI)1099-0755(199709)7:3<253::AID-AQC243>3.0.CO;2-1.

Bavestrello, G., Bo, M., Canese, S., Sandulli, R., and Cattaneo-Vietti, R. (2014). The red coral populations of the gulfs of Naples and Salerno: human impact and deep mass mortalities. Ital. J. Zool. 81, 552–563. doi:10.1080/11250003.2014.950349.

Betti, F., Bavestrello, G., Fravega, L., Bo, M., Coppari, M., Enrichetti, F., et al. (2019). On the effects of recreational SCUBA diving on fragile benthic species: The Portofino MPA (NW Mediterranean Sea) case study. Ocean Coast. Manag. 182. doi:10.1016/j.ocecoaman.2019.104926.

Betti, F., Bavestrello, G., Bo, M., Ravanetti, G., Enrichetti, F., Coppari, M., et al. (2020a). Evidences of fishing impact on the coastal gorgonian forests inside the Portofino MPA (NW Mediterranean Sea). Ocean Coast. Manag. 187. doi:10.1016/j.ocecoaman.2020.105105.

Betti, F., Bavestrello, G., Bo, M., Enrichetti, F., and Cattaneo-Vietti, R. (2020b). Effects of the 2018 exceptional storm on the *Paramuricea clavata* (Anthozoa, Octocorallia) population of the Portofino Promontory (Mediterranean Sea). Reg. Stud. Mar. Sci. 34. doi:10.1016/j.rsma.2019.101037.

Bo, M., Bavestrello, G., Canese, S., Giusti, M., Angiolillo, M., Cerrano, C., et al. (2011). Coral assemblage off the Calabrian coast (South Italy) with new observations on living colonies of Antipathes dichotoma. Ital. J. Zool. 78, 231–242. doi:10.1080/11250001003652619.

Bo, M., Canese, S., Spaggiari, C., Pusceddu, A., Bertolino, M., Angiolillo, M., et al. (2012). Deep Coral Oases in the South Tyrrhenian Sea. PLoS One 7, e49870. doi:10.1371/journal.pone.0049870.

Bo, M., Canese, S., and Bavestrello, G. (2014a). Discovering Mediterranean black coral forests: *Parantipathes larix* (Anthozoa: Hexacorallia) in the Tuscan Archipelago, Italy. Ital. J. Zool. 81, 112–125. doi:10.1080/11250003.2013.859750.

Bo, M., Bava, S., Canese, S., Angiolillo, M., Cattaneo-Vietti, R., and Bavestrello, G. (2014b). Fishing impact on deep Mediterranean rocky habitats as revealed by ROV investigation. Biol. Conserv. 171, 167–176. doi:10.1016/j.biocon.2014.01.011.

Bo, M., Cerrano, C., Canese, S., Salvati, E., Angiolillo, M., Santangelo, G., et al. (2014c). The coral assemblages of an offshore deep Mediterranean rocky bank (NW Sicily, Italy). Mar. Ecol. 35, 332–342. doi:10.1111/maec.12089.

Bo, M., Bavestrello, G., Angiolillo, M., Calcagnile, L., Canese, S., Cannas, R., et al. (2015). Persistence of pristine deep-sea coral gardens in the Mediterranean Sea (SW Sardinia). PLoS One 10, 1–21. doi:10.1371/journal.pone.0119393.

Bo, M., Coppari, M., Betti, F., Massa, F., Gay, G., Cattaneo-Vietti, R., et al. (2020). Unveiling the deep biodiversity of the Janua Seamount (Ligurian Sea): first Mediterranean sighting of the rare Atlantic bamboo coral Chelidonisis aurantiaca Studer, 1890. Deep. Res. Part I Oceanogr. Res. Pap. 156. doi:10.1016/j.dsr.2019.103186.

Bonhomme, D., Astruch, P., Goujard, A., Bonhomme, P., Antonioli, P.A. et al. (2011). Description et cartographie des habitats et biocénoses du mileiu marin du Parc national de Port-Cros. Contrat GIS Posidonie - parc national de Port-Cros, GIS Posidonie publi. 388.

Butterworth, A., Clegg, I., and Bass, C. (2012). Untangled. Marine debris: A global picture of the impact on Animal welfare and of animal-focused solutions. London, United Kingdom.

Cánovas-Molina, A., Montefalcone, M., Bavestrello, G., Cau, A., Bianchi, C. N., Morri, C., et al. (2016). A new ecological index for the status of mesophotic megabenthic assemblages in the Mediterranean based on ROV photography and video footage. Cont. Shelf Res. 121, 13–20. doi:10.1016/j.csr.2016.01.008.

Cattaneo-Vietti, R., Bavestrello, G., Bo, M., Canese, S., Vigo, A., and Andaloro, F. (2017). Illegal ingegno fishery and conservation of deep red coral banks in the Sicily Channel (Mediterranean Sea). Aquat. Conserv. Mar. Freshw. Ecosyst. 27, 604–616. doi:10.1002/aqc.2731.

Cau, A., Alvito, A., Moccia, D., Canese, S., Pusceddu, A., Rita, C., et al. (2017). Submarine canyons along the upper Sardinian slope (Central Western Mediterranean) as repositories for derelict fishing gears. Mar. Pollut. Bull. 123, 357–364. doi:10.1016/j.marpolbul.2017.09.010.

Chimienti, G., Bo, M., Taviani, M., and Mastrototaro, F. (2019). “Occurrence and Biogeography of Mediterranean Cold-Water Corals,” in Mediterranean Cold-Water Corals: Past, Present and Future, ed. C. J. C. Orejas (Springer International Publishing AG), 213–243. doi:10.1007/978-3-319-91608-8_19.

Chimienti, G. (2020). Vulnerable Forests of the Pink Sea Fan *Eunicella verrucosa* in the Mediterranean Sea. Diversity 12, 176. doi:10.3390/d12050176.

Chimienti, G., De Padova, D., Mossa, M., and Mastrototaro, F. (2020). A mesophotic black coral forest in the Adriatic Sea. Sci. Rep. 10, 8504. doi:10.1038/s41598-020-65266-9.

Consoli, P., Andaloro, F., Altobelli, C., Battaglia, P., Campagnuolo, S., Canese, S., et al. (2018). Marine litter in an EBSA (Ecologically or Biologically Significant Area) of the central Mediterranean Sea: Abundance, composition, impact on benthic species and basis for monitoring entanglement. Environ. Pollut. 236, 405–415. doi:10.1016/j.envpol.2018.01.097.

Consoli, P., Romeo, T., Angiolillo, M., Canese, S., Esposito, V., Salvati, E., et al. (2019). Marine litter from fishery activities in the Western Mediterranean Sea: The impact of entanglement on marine animal forests. Environ. Pollut. 249, 472–481. doi:10.1016/j.envpol.2019.03.072.

Consoli, P., Sinopoli, M., Deidun, A., Canese, S., Berti, C., Andaloro, F., et al. (2020). The impact of marine litter from fish aggregation devices on vulnerable marine benthic habitats of the central Mediterranean Sea. Mar. Pollut. Bull. 152, 110928. doi:10.1016/j.marpolbul.2020.110928.

D’Onghia, G., Calculli, C., Capezzuto, F., Carlucci, R., Carluccio, A., Grehan, A., et al. (2017). Anthropogenic impact in the Santa Maria di Leuca cold-water coral province (Mediterranean Sea): Observations and conservation straits. Deep Sea Res. Part II Top. Stud. Oceanogr. 145, 87–101. doi:10.1016/j.dsr2.2016.02.012.

Deidun, A., Andaloro, F., Bavestrello, G., Canese, S., Consoli, P., Micallef, A., et al. (2015). First characterisation of a *Leiopathes glaberrima* (Cnidaria: Anthozoa: Antipatharia) forest in Maltese exploited fishing grounds. Ital. J. Zool. 82, 271–280. doi:10.1080/11250003.2014.986544.

Enrichetti, F., Bava, S., Bavestrello, G., Betti, F., Lanteri, L., and Bo, M. (2019). Artisanal fishing impact on deep coralligenous animal forests: A Mediterranean case study of marine vulnerability. Ocean Coast. Manag. 177, 112–126. doi:10.1016/j.ocecoaman.2019.04.021.

Enrichetti, F., Dominguez-Carrió, C., Toma, M., Bavestrello, G., Canese, S., and Bo, M. (2020). Assessment and distribution of seafloor litter on the deep Ligurian continental shelf and shelf break (NW Mediterranean Sea). Mar. Pollut. Bull. 151. doi:10.1016/j.marpolbul.2019.110872.

Fabri, M. C., Pedel, L., Beuck, L., Galgani, F., Hebbeln, D., and Freiwald, A. (2014). Megafauna of vulnerable marine ecosystems in French Mediterranean submarine canyons: Spatial distribution and anthropogenic impacts. Deep. Res. Part II Top. Stud. Oceanogr. 104, 184–207. doi:10.1016/j.dsr2.2013.06.016.

Fabri, M. C., Vinha, B., Allais, A. G., Bouhier, M. E., Dugornay, O., Gaillot, A., et al. (2019). Evaluating the ecological status of cold-water coral habitats using non-invasive methods: An example from Cassidaigne canyon, northwestern Mediterranean Sea. Prog. Oceanogr. 178, 102172. doi:10.1016/j.pocean.2019.102172.

Fanelli, E., Delbono, I., Ivaldi, R., Pratellesi, M., Cocito, S., and Peirano, A. (2017). Cold-water coral Madrepora oculata in the eastern Ligurian Sea (NW Mediterranean): Historical and recent findings. Aquat. Conserv. Mar. Freshw. Ecosyst. 27, 965–975. doi:10.1002/aqc.2751.

Ferrigno, F., Russo, G. F., and Sandulli, R. (2017). Coralligenous Bioconstructions Quality Index (CBQI): a synthetic indicator to assess the status of different types of coralligenous habitats. Ecol. Indic. 82, 271–279. doi:10.1016/j.ecolind.2017.07.020.

Freiwald, A., Beuck, L., Ruggeberg, A., Taviani, M., and Hebbeln, D. (2009). The white coral community in the central Mediterranean sea revealed by ROV surveys. Oceanography 22, 27. doi:https://www.jstor.org/stable/24860923.

Freiwald, A., Rogers, A., Hall-Spencer, J., Guinotte, J. M., Davies, A. J., et al. (2017). Global distribution of cold-water corals (version 5.0). Fifth update to the dataset in Freiwald et al. (2004) by UNEP-WCMC, in collaboration with Andre Freiwald and John Guinotte. Cambridge (UK): UN Environment World Conservation Monitoring Centre. URL: http://data.unep-wcmc.org/datasets/3

Gili, J.-M., Sardá, R., Madurell, T., and Rossi, S. (2014). “Zoobenthos,” in The Mediterranean Sea: Its History and Present Challenges, eds. S. Goffredo and Z. Dubinsky (Dordrecht: Springer Science+Business Media), 1–678. doi:10.1007/978-94-007-6704-1.

Giusti, M., Canese, S., Fourt, M., Bo, M., Innocenti, C., Goujard, A., et al. (2019). Coral forests and Derelict Fishing Gears in submarine canyon systems of the Ligurian Sea. Prog. Oceanogr. 178. doi:10.1016/j.pocean.2019.102186.

Harmelin, J.-G., and Marinopoulos, J. (1994). Population structure and partial mortality of the gorgonian Paramuricea clavata (Risso) in the northwestern Mediterranean (France, Port-Cros Island). Mar. Life 4, 5–13.

Houard, T., Boudouresque, C. F., Barcelo, A., Cottalorda, J., Formentin, J., Jullian, E., et al. (2012). Occurrence of a lost fishing net within the marine area of the Port-Cros National Park (Provence, northwestern Mediterranean Sea). Sci. Reports Port-Cros National Park 118, 109–118.

Kipson, S., Linares, C., Čižmek, H., Cebrián, E., Ballesteros, E., Bakran-Petricioli, T., et al. (2015). Population structure and conservation status of the red gorgonian Paramuricea clavata (Risso, 1826) in the Eastern Adriatic Sea. Mar. Ecol. 36, 982–993. doi:10.1111/maec.12195.

Lastras, G., Canals, M., Ballesteros, E., Gili, J. M., and Sanchez-Vidal, A. (2016). Cold-water corals and anthropogenic impacts in la Fonera submarine canyon head, Northwestern Mediterranean Sea. PLoS One 11, 1–36. doi:10.1371/journal.pone.0155729.

Madurell, T., Orejas, C., Requena, S., Gori, A., Purroy, A., Lo Iacono, C., et al. (2012). “The benthic communities of the Cap de Creus canyon,” in Mediterranean submarine canyons: ecology and governance, 123–132.

Maldonado, M., López-Acosta, M., Sánchez-Tocino, L., and Sitjà, C. (2013). The rare, giant gorgonian Ellisella paraplexauroides: demographics and conservation concerns. Mar. Ecol. Prog. Ser. 479, 127–141. doi:10.3354/meps10172.

Maldonado, M., Aguilar, R., Blanco, J., García, S., Serrano, A., and Punzón, A. (2015). Aggregated clumps of lithistid sponges: A singular, reef-like bathyal habitat with relevant paleontological connections. PLoS One 10. doi:10.1371/journal.pone.0125378.

Mecho, A., Aguzzi, J., De Mol, B., Lastras, G., Ramirez-Llodra, E., Bahamon, N., et al. (2018). Visual faunistic exploration of geomorphological human-impacted deep-sea areas of the northwestern Mediterranean Sea. J. Mar. Biol. Assoc. United Kingdom 98, 1241–1252. doi:10.1017/S0025315417000431.

Melli, V., Angiolillo, M., Ronchi, F., Canese, S., Giovanardi, O., Querin, S., et al. (2017). The first assessment of marine debris in a Site of Community Importance in the northwestern Adriatic Sea (Mediterranean Sea). Mar. Pollut. Bull. 114, 821–830. doi:10.1016/j.marpolbul.2016.11.012.

Moccia, D., Cau, A., Alvito, A., Canese, S., Cannas, R., Bo, M., et al. (2019). New sites expanding the “Sardinian cold-water coral province” extension: A new potential cold-water coral network? Aquat. Conserv. Mar. Freshw. Ecosyst. 29, 153–160. doi:10.1002/aqc.2975.

Moschino, V., Riccato, F., Fiorin, R., Nesto, N., Picone, M., Boldrin, A., et al. (2019). Is derelict fishing gear impacting the biodiversity of the Northern Adriatic Sea? An answer from unique biogenic reefs. Sci. Tot. Environ. 663, 387–399. <https://doi.org/10.1016/j.scitotenv.2019.01.363>

Orejas, C., Gori, A., Lo Iacono, C., Puig, P., Gili, J. M., and Dale, M. R. T. (2009). Cold-water corals in the Cap de Creus canyon, northwestern Mediterranean: Spatial distribution, density and anthropogenic impact. Mar. Ecol. Prog. Ser. 397, 37–51. doi:10.3354/meps08314.

Orejas, C., Gori, A., Jiménez, C., Rivera, J., Kamidis, N., Abu Alhaija, R., et al. (2019). Occurrence and distribution of the coral Dendrophyllia ramea in Cyprus insular shelf: Environmental setting and anthropogenic impacts. Deep. Res. Part II Top. Stud. Oceanogr. 164, 190–205. doi:10.1016/j.dsr2.2019.04.006.

Pierdomenico, M., Russo, T., Ambroso, S., Gori, A., Martorelli, E., D’Andrea, L., et al. (2018). Effects of trawling activity on the bamboo-coral *Isidella elongata* and the sea pen *Funiculina quadrangularis* along the Gioia Canyon (Western Mediterranean, southern Tyrrhenian Sea). Prog. Oceanogr. 169, 214–226. doi:10.1016/j.pocean.2018.02.019.

Pierdomenico, M., Cardone, F., Carluccio, A., Casalbore, D., Chiocci, F., Maiorano, P., et al. (2019). Megafauna distribution along active submarine canyons of the central Mediterranean: Relationships with environmental variables. Prog. Oceanogr. 171, 49–69. doi:10.1016/j.pocean.2018.12.015.

Prampolini, M., Angeletti, L., Grande, V., Taviani, M., and Foglini, F. (2020). “Tricase Submarine Canyon: cold-water coral habitats in the southwesternmost Adriatic Sea (Mediterranean Sea),” in Seafloor Geomorphology as Benthic Habitat, 793–810. doi:10.1016/b978-0-12-814960-7.00048-8.

Ramirez-Llodra, E., Tyler, P. A., Baker, M. C., Bergstad, O. A., Clark, M. R., Escobar, E., et al. (2011). Man and the Last Great Wilderness: Human Impact on the Deep Sea. PLoS One 6, e22588. doi:10.1371/journal.pone.0022588.

Salomidi, M., Smith, C., Katsanevakis, S., and Panayotidis, P. (2009). Some observations on the structure and distribution of gorgonian assemblages in the Eastern Mediterranean Sea. In 1er Symposium sur la Conservation du Coralligène et autres bio concrétions de Méditerranée (pp. 16–17). Tabarka.

Savini, A., Vertino, A., Marchese, F., Beuck, L., and Freiwald, A. (2014). Mapping cold-water coral habitats at different scales within the Northern Ionian Sea (central Mediterranean): An assessment of coral coverage and associated vulnerability. PLoS One 9. doi:10.1371/journal.pone.0087108.

Sbrescia, L., Di Stefano, F., Russo, M., and Russo, G. F. (2008). Influence of sport fishing on gorgonians in MPA of Punta Campanella. Biologia Marina Mediterranea, 15, 172–173.

Sini, M., Kipson, S., Linares, C., Koutsoubas, D., and Garrabou, J. (2015). The yellow gorgonian *Eunicella cavolini*: Demography and disturbance levels across the Mediterranean Sea. PLoS One 10. doi:10.1371/journal.pone.0126253.

Taviani, M., Angeletti, L., Canese, S., Cannas, R., Cardone, F., Cau, A. B., et al. (2017). The “Sardinian cold-water coral province” in the context of the Mediterranean coral ecosystems. Deep Sea Res. Part II Top. Stud. Oceanogr. 145, 61–78. doi:10.1016/j.dsr2.2015.12.008.

Taviani, M., Angeletti, L., Cardone, F., Montagna, P., and Danovaro, R. (2019). A unique and threatened deep water coral-bivalve biotope new to the Mediterranean Sea offshore the Naples megalopolis. Sci. Rep. 9, 1–12. doi:10.1038/s41598-019-39655-8.

Terrón-Sigler, A. (2015a) Conservation biology of the endangered orange coral *Astroides calycularis*. [Ph.D. thesis]. [Seville (SP)]: The University of Seville.

Terrón-Sigler, A., Casado de Amezúa, P., León-Muez, D., Peñalver, P., and Espinosa-Torre, F. (2015b). La presión pesquera sobre los invertebrados marinos de porte rígido: El coral candelabro (*Dendrophyllia ramea*) una especie sensible a los artes de pesca. Quercus 352, 26-32.
